# Supplementary material
Source: PubMed Central journal article supplement (PMC7960318)
Supplement: 15-00861.pdf [file 15-00861.pdf]

**On-line Table 1: One-way ANOVA reveals significant differences in DTI scalars for white matter tracts between patients with hemispherectomy and age- and sex-matched controls**

| White Matter Tracts | DTI Scalars | ANOVA                          |
|---------------------|-------------|--------------------------------|
| ACR                 | FA          | $F(2,37) = 4.53, P = .017$     |
| ACR                 | RD          | $F(2,37) = 5.03, P = .012$     |
| PCR                 | FA          | $F(2,37) = 4.889, P = .013$    |
| CGC                 | FA          | $F(2,37) = 11.33, P = .0001$   |
| CGC                 | MD          | $F(2,37) = 6.581, P = .004$    |
| CGC                 | AD          | $F(2,37) = 4.569, P = .017$    |
| CGC                 | RD          | $F(2,37) = 10.573, P = .0002$  |
| SFO                 | MD          | $F(2,37) = 4.542, P = .017$    |
| SFO                 | RD          | $F(2,37) = 5.916, P = .006$    |
| GCC                 | FA          | $F(2,37) = 49.89, P < .0001$   |
| GCC                 | MD          | $F(2,37) = 6.074, P = .005$    |
| GCC                 | AD          | $F(2,37) = 3.431, P = .043$    |
| GCC                 | RD          | $F(2,37) = 26.52, P < .0001$   |
| BCC                 | FA          | $F(2,37) = 185.157, P < .0001$ |
| BCC                 | MD          | $F(2,37) = 16.97, P = .0001$   |
| BCC                 | AD          | $F(2,37) = 4.76, P = .014$     |
| BCC                 | RD          | $F(2,37) = 67.47, P < .0001$   |
| SCC                 | FA          | $F(2,37) = 182.86, P < .0001$  |
| SCC                 | MD          | $F(2,37) = 18.42, P < .0001$   |
| SCC                 | RD          | $F(2,37) = 71, P < .0001$      |

**Note:**—ACR indicates anterior corona radiata; BCC, body of the corpus callosum; GCC, genu of the corpus callosum; PCR, posterior corona radiata; SCC, splenium of the corpus callosum; SFO, superior fronto-occipital fasciculus.

**On-line Table 2: Post hoc analyses using the Tukey significant difference test showing significant differences in DTI scalars for white matter tracts between patients with congenital and acquired underlying disease leading to hemispherectomy and age- and sex-matched controls**

| White Matter Tracts | DTI Scalars | Group of Subjects | Mean Difference | P Values   | 95% Confidence Interval |             |       |
|---------------------|-------------|-------------------|-----------------|------------|-------------------------|-------------|-------|
|                     |             |                   |                 |            | Lower Bound             | Upper Bound |       |
| ACR                 | FA          | Congenital        | Control         | -0.04      | .02                     | -0.07       | -0.01 |
|                     |             | Control           | Congenital      | -0.09      | .02                     | -0.17       | -0.01 |
| PCR                 | FA          | Congenital        | Control         | -0.05      | .02                     | -0.10       | -0.01 |
|                     |             | Control           | Acquired        | -0.03      | .04                     | -0.06       | 0.00  |
| CGC                 | FA          | Congenital        | Control         | -0.05      | <.0001                  | -0.07       | -0.02 |
|                     |             |                   | Congenital      | Acquired   | -0.10                   | .02         | -0.19 |
|                     | MD          | Control           | Acquired        | -0.12      | .02                     | -0.21       | -0.02 |
|                     |             |                   | Congenital      | Acquired   | -0.15                   | .02         | -0.28 |
|                     | AD          | Control           | Congenital      | -0.12      | .001                    | -0.19       | -0.05 |
|                     |             |                   | Control         | Acquired   | -0.10                   | .01         | -0.18 |
| SFO                 | MD          | Control           | Congenital      | -0.12      | .03                     | -0.23       | -0.01 |
|                     |             | Control           | Congenital      | -0.12      | .006                    | -0.21       | -0.03 |
| GCC                 | FA          | Control           | Congenital      | 0.22       | <.0001                  | 0.16        | 0.29  |
|                     |             |                   | Control         | Acquired   | 0.21                    | <.0001      | 0.14  |
|                     | MD          | Control           | Acquired        | -0.17      | .01                     | -0.30       | -0.04 |
|                     |             |                   | Control         | Congenital | 0.17                    | .03         | 0.01  |
| BCC                 | FA          | Control           | Congenital      | -0.25      | <.0001                  | -0.35       | -0.14 |
|                     |             |                   | Control         | Acquired   | -0.29                   | <.0001      | -0.40 |
|                     | MD          | Control           | Congenital      | 0.26       | <.0001                  | 0.22        | 0.29  |
|                     |             |                   | Control         | Acquired   | 0.25                    | <.0001      | 0.20  |
| SCC                 | FA          | Control           | Congenital      | -0.17      | .0001                   | -0.26       | -0.08 |
|                     |             |                   | Control         | Acquired   | -0.20                   | .0001       | -0.29 |
|                     | AD          | Control           | Congenital      | 0.15       | .01                     | 0.03        | 0.26  |
|                     |             |                   | Control         | Congenital | -0.33                   | <.0001      | -0.41 |
| SCC                 | FA          | Control           | Acquired        | -0.34      | <.0001                  | -0.43       | -0.25 |
|                     |             |                   | Control         | Congenital | 0.25                    | <.0001      | 0.21  |
|                     | MD          | Control           | Acquired        | 0.28       | <.0001                  | 0.23        | 0.32  |
|                     |             |                   | Control         | Congenital | -0.18                   | <.0001      | -0.28 |
| RD                  | Control     | Acquired          | -0.24           | <.0001     | -0.35                   | -0.13       |       |
|                     |             | Control           | Congenital      | -0.33      | <.0001                  | -0.42       | -0.25 |
|                     |             |                   | Acquired        | -0.39      | <.0001                  | -0.49       | -0.29 |

**Note:**—ACR indicates anterior corona radiata; BCC, body of the corpus callosum; GCC, genu of the corpus callosum; PCR, posterior corona radiata; SCC, splenium of the corpus callosum; SFO, superior fronto-occipital fasciculus.

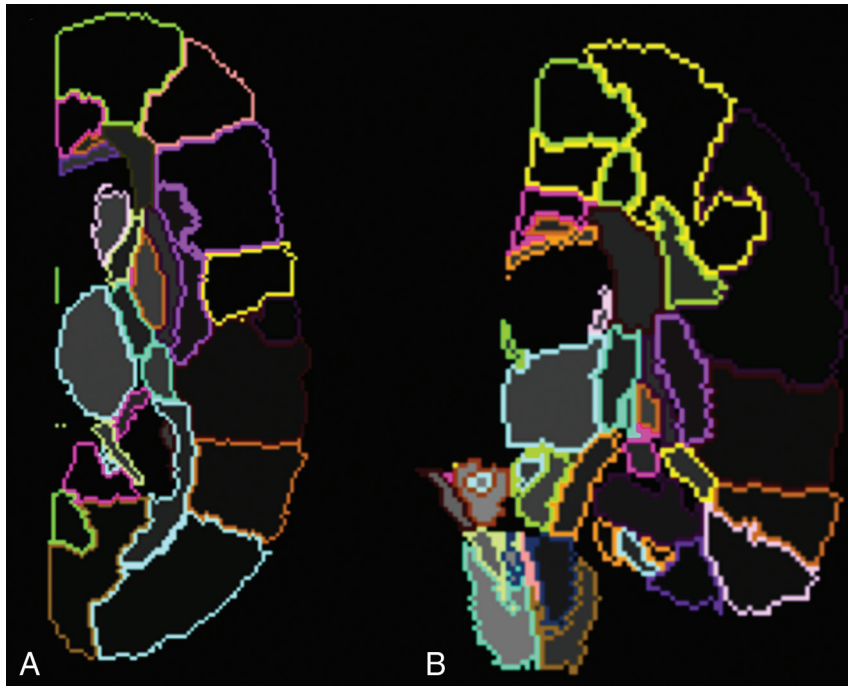

**ON-LINE FIG 1.** Axial (A) and coronal (B) reconstructions of the “half-brain JHMI-MNU template” parcellation maps.

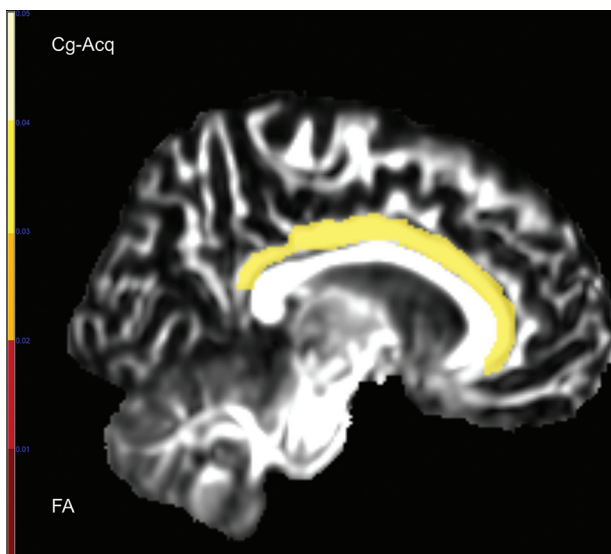

**ON-LINE FIG 2.** Results of the ABA. Among patients with anatomic hemispherectomy due to a congenital (Cg) and acquired (Acq) pathology, only FA in the cingulate bundle showed a significant difference and was lower in patients with congenital compared with acquired pathology. Only results that survived the Tukey significant difference test are depicted, with  $P < .05$ . The *color bar* represents the  $P$  value.
